# Supplementary material for: High-capacity zinc–iodine flow batteries enabled by a polymer–polyiodide complex cathode
Source: Royal Society of Chemistry journal article supplement (doi:10.1039/d1ta03905a), 2021-01-01
Supplement: d1ta03905a1.pdf [file d1ta03905a1.pdf]

Supporting Information

## High-capacity zinc-iodine flow batteries enabled by a polymer-polyiodide complex cathode

Jing Yang<sup>a,b</sup>, Yuxi Song<sup>a</sup>, Qinghua Liu<sup>c</sup>, Ao Tang<sup>a,\*</sup>

<sup>a</sup> Institute of Metal Research, Chinese Academy of Sciences, Shenyang, China

<sup>b</sup> Nano Science and Technology Institute, University of Science and Technology of China, Suzhou, China

<sup>c</sup> National Institute of Clean-and-Low-Carbon Energy, Beijing, China

\*Corresponding author: Ao Tang

Email: [a.tang@imr.ac.cn](mailto:a.tang@imr.ac.cn) Tel: +86-024-81083919 Fax: +86-024-23998320

### S1. Volumetric Capacity and Energy Density

Given the stoichiometric ratio of transferred electron to iodine or iodide reactant ( $\xi$ ), Faraday's constant ( $F$ ), concentration of iodine or iodide reactant in the catholyte ( $c$ ), and open circuit voltage ( $OCV$ ), the theoretical volumetric capacity ( $C_V$ , Ah/L) and volumetric energy density ( $E_V$ , Wh/L) in the flow battery can be calculated by the following equations:

$$C_V = \frac{F \times C \times \xi}{3600} \quad (S1)$$

$$E_V = C_V \times OCV \quad (S2)$$

For 6 M KI, we can calculate the theoretical volumetric capacity and energy density of the ZIFB as follows:

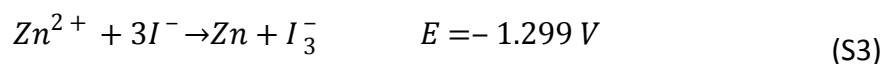

$$C_V = \frac{96485 \times 6 \times \frac{2}{3}}{3600} = 107.2 \text{ (Ah/L)}$$

$$E_V = 107.2 \times 1.299 = 139.25 \text{ (Wh/L)}$$

For 6 M KI with PVP, we can calculate the theoretical volumetric capacity and energy density of the PVP-ZIFB as follows:

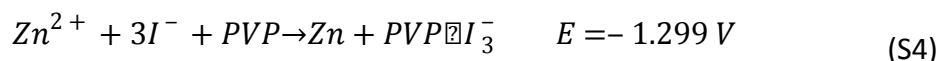

$$C_V = \frac{96485 \times 6 \times 1}{3600} = 160.8 \text{ (Ah/L)}$$

$$E_V = 160.8 \times 1.299 = 208.87 \text{ (Wh/L)}$$

It is noted that both reaction (S3) and (S4) can exist in the catholyte of PVP-ZIFB. For 6 M I<sup>-</sup>, therefore, the volumetric capacity would be a value between 107.2 to 160.8 Ah/L, while the energy density is between 139.25 and 208.87 Wh/L, as summarized in Table S4.

## S2. Molar Capacity

Molar capacity ( $C_n$ ) is defined as the volumetric discharge capacity per molar concentration of I<sup>-</sup> initially dissolved in catholyte, as given in Eq. (S5)

$$C_n = \frac{C_V}{C_s} \quad (S5)$$

where  $C_V$  is the volumetric capacity for a given salt concentration of  $C_s$  in catholyte, which can be further derived as shown in Eq. (S6)

$$C_V = \frac{Q_e}{V_s} = \frac{n_e F}{n_s} = \frac{n_e}{n_s} F c_s = \xi_{e/s} F c_s \quad (S6)$$

where  $Q_e$  is the total quantity of electric charge from the electrochemical conversion between iodide and triiodide/iodine in catholyte,  $V_s$  is the volume of the catholyte,  $F$  is Faraday constant,  $n_e$  is the molar amount of transferred electrons and  $n_s$  is the molar amount of the salt in the fixed volume of catholyte where the subscript  $s$  means KI or ZnI<sub>2</sub> dissolved in catholyte,  $\xi_{e/s}$  means the stoichiometric number of transferred electrons with respect to different salt solutes. Combining Eq. (S5) and Eq. (S6), one can obtain Eq. (S7)

$$C_n = \xi_{e/s} F \quad (S7)$$

where  $\xi_{e/s}$  is 2/3 for KI, 1 for KI with PVP and 2 for ZnI<sub>2</sub>. Based on Eq. (S7), the theoretical molar capacities of KI, KI with PVP and ZnI<sub>2</sub> are calculated to be 17.87 26.8 and 35.74 Ah/mol, respectively.

$$C_n = \xi_{e/s} F = \frac{2}{3} \times 96484 = 17.86 \text{ (Ah/mol)}$$

$$C_n = \xi_{e/s} F = 1 \times 96484 = 26.8 \text{ (Ah/mol)}$$

$$C_n = \xi_{e/s} F = 2 \times 96484 = 35.74 \text{ (Ah/mol)}$$

Finally, the unlock capacity can be defined as

$$\text{Unlock capacity (\%)} = \frac{C_n(\text{KI} + \text{PVP}) - C_n(\text{KI})}{C_n(\text{KI})} \times 100\%$$

$$\text{Unlock capacity (\%)} = \frac{C_n(\text{ZnI}_2 + \text{complexing agent}) - C_n(\text{ZnI}_2)}{C_n(\text{ZnI}_2)} \times 100\%$$

The unlocking capacities for different catholyte compositions are summarized in

Table S7.

### S3. Cost calculation

The cost of each of the chemicals is referred to the website ([www.macklin.cn](http://www.macklin.cn)), which is listed in Table S5. Based on Table S5 and S6, the cost of the iodine-based catholyte can be estimated according to the following equations:

For inorganic additives:

$$\text{Cost of catholyte } (\$/(\text{mol} \cdot \text{L}^{-1})) = \left[ P_a \times \frac{1}{C_a} + P_{a,s} \times \frac{1}{C_{a,s}} \right] \times \frac{1 \text{ Ah}}{\text{Cap}_a} \quad (\text{S8})$$

For polymer additives:

$$\text{Cost of catholyte } (\$/(\text{mol} \cdot \text{L}^{-1})) = \left[ P_a \times \frac{1 \text{ Ah}}{\text{Cap}_a} \right] \times \frac{1}{C_a} + \frac{P_{1,a,s} \times m_{a,s}}{C_a} \quad (\text{S9})$$

where in the catholyte, the  $P_a$  is the price of active material ( $\$/\text{mol}$ ),  $C_a$  is the concentration of the active material ( $\text{mol}/\text{L}$ ),  $P_{a,s}$  is the cost of the supporting material ( $\$/\text{mol}$ ),  $P_{1,a,s}$  is the cost of the supporting material ( $\$/\text{g}$ ),  $C_a$  is the concentration of active material ( $\text{mol}/\text{L}$ ),  $C_{a,s}$  is the concentration of supporting electrolyte ( $\text{mol}/\text{L}$ ), and  $\text{Cap}_a$  are the capacity at the given active material ( $\text{Ah}/\text{mol}$ ), the  $m_{a,s}$  is the mass of the supporting material ( $\text{g}$ ).

For KI:

$$P_{KI} = 0.09 \frac{\$}{\text{g}} \times 166 \frac{\text{g}}{\text{mol}} = 14.96 \frac{\$}{\text{mol}}$$

$$\begin{aligned} \text{Cost of (KI)} &= P_{KI} \times \frac{1 \text{ Ah}}{\text{Cap}_{KI}} \\ &= 14.96 \times \frac{1}{12} \times 1 = 1.186 (\$/(\text{mol} \cdot \text{L}^{-1})) \end{aligned}$$

For KI+PVP:

$$P_{KI} = 0.09 \frac{\$}{\text{g}} \times 166 \frac{\text{g}}{\text{mol}} = 14.96 \frac{\$}{\text{mol}}$$

$$\text{Cost of (PVP)} = \left( 0.03 \frac{\$}{\text{g}} \times 0.18 \text{ g} \right) = 0.005 (\$)$$

$$\begin{aligned} \text{Cost of (KI + PVP)} &= \left[ P_{KI} \times \frac{1 \text{ Ah}}{\text{Cap}_{KI}} \right] \times \frac{1}{C_{KI}} + \frac{P_{PVP} \times m_{PVP}}{C_{KI}} \\ &= \frac{14.96}{19} + 0.005 = 0.754 (\$/(\text{mol} \cdot \text{L}^{-1})) \end{aligned}$$

For  $\text{ZnI}_2$ :

$$P_{ZnI_2} = \left(0.16 \frac{\$}{g} \times 319 \frac{g}{mol}\right) = 51.04 \left(\frac{\$}{mol}\right)$$

$$Cost\ of\ (ZnI_2) = P_{ZnI_2} \times \frac{1\ Ah}{Cap_{ZnI_2}} \times \frac{1}{C_{ZnI_2}} = \frac{51.04}{28} = 1.82\ (\$/(\text{mol} \cdot L^{-1}))$$

For  $ZnI_2 + ZnBr_2$ :

$$P_{ZnI_2} = \left(0.16 \frac{\$}{g} \times 319 \frac{g}{mol}\right) = 51.04 \left(\frac{\$}{mol}\right)$$

$$P_{ZnBr_2} = \left(0.06 \frac{\$}{g} \times 225 \frac{g}{mol}\right) = 11.18 \left(\frac{\$}{mol}\right)$$

$$Cost\ of\ (ZnI_2 + ZnBr_2) = \left[ P_{ZnI_2} \times \frac{1}{C_{ZnI_2}} + P_{ZnBr_2} \times \frac{1}{C_{ZnBr_2}} \right] \times \frac{1\ Ah}{Cap_{ZnI_2}}$$

$$= \frac{51.04 + 14.18 \times 2}{35} = 2.09\ (\$/(\text{mol} \cdot L^{-1}))$$

For  $NH_4I + NH_4Cl$ :

$$P_{NH_4I} = \left(0.16 \frac{\$}{g} \times 144.94 \frac{g}{mol}\right) = 23.19 \left(\frac{\$}{mol}\right)$$

$$P_{NH_4Cl} = \left(0.006 \frac{\$}{g} \times 53.49 \frac{g}{mol}\right) = 0.33 \left(\frac{\$}{mol}\right)$$

$$Cost\ of\ (NH_4I + NH_4Cl) = \left[ P_{NH_4I} \times \frac{1}{C_{NH_4I}} + P_{NH_4Cl} \times \frac{1}{C_{NH_4Cl}} \right] \times \frac{1\ Ah}{Cap_{NH_4I}}$$

$$= \frac{23.19 + 0.33 \times 2}{17.9} = 1.33\ (\$/(\text{mol} \cdot L^{-1}))$$

For  $ZnI_2 + NH_4Br$ :

$$P_{ZnI_2} = \left(0.16 \frac{\$}{g} \times 319 \frac{g}{mol}\right) = 51.04 \left(\frac{\$}{mol}\right)$$

$$P_{NH_4Br} = \left(0.016 \frac{\$}{g} \times 97.94 \frac{g}{mol}\right) = 1.57 \left(\frac{\$}{mol}\right)$$

$$Cost\ of\ (ZnI_2 + NH_4Br) = \left[ P_{ZnI_2} \times \frac{1}{C_{ZnI_2}} + P_{NH_4Br} \times \frac{1}{C_{NH_4Br}} \right] \times \frac{1\ Ah}{Cap_{ZnI_2}}$$

$$= \frac{51.04 + 1.57}{35} = 1.50\ (\$/(\text{mol} \cdot L^{-1}))$$

For  $NaI$ :

$$P_{NaI} = \left(0.11 \frac{\$}{g} \times 149.89 \frac{g}{mol}\right) = 16.49 \left(\frac{\$}{mol}\right)$$

$$Cost\ of\ (NaI) = \left[ P_{NaI} \times \frac{1}{C_{NaI}} \right] \times \frac{1\ Ah}{Cap_{NaI}}$$

$$= \frac{16.49}{17.86} = 0.92 \text{ (\$/(\text{mol} \cdot \text{L}^{-1}))}$$

*Cost of (NaI + PC) > 0.92 (\\$/(\text{mol} \cdot \text{L}^{-1}))*

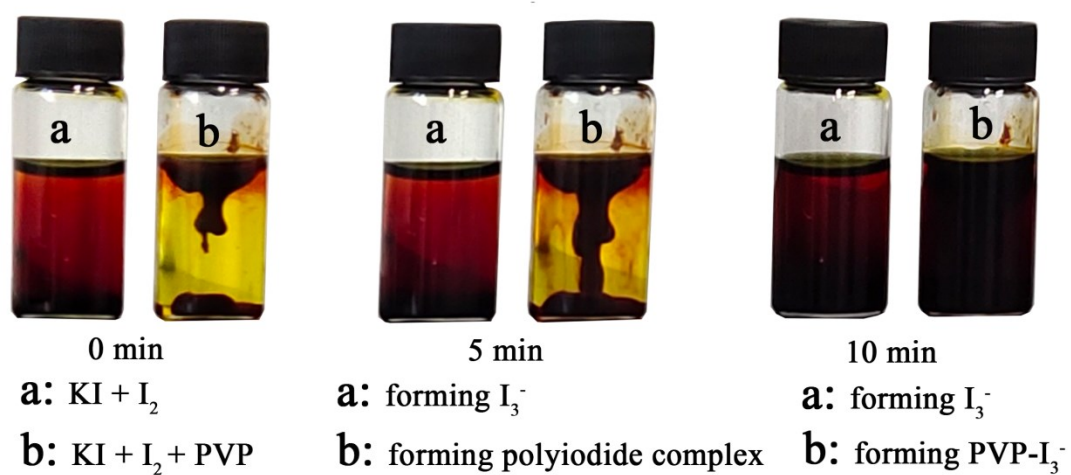

Fig. S1. Variations of the KI solutions with and without PVP additives over time (a) 0 min; (b) 5 min; (c) 10 min.

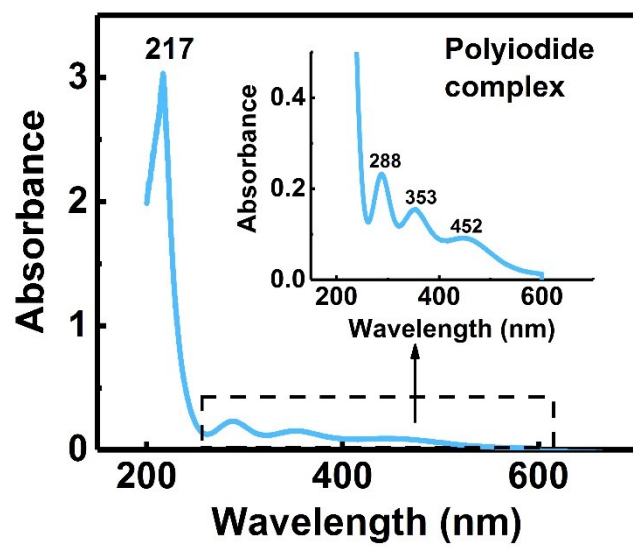

Fig. S2. Ultraviolet spectrum of polyiodide complex.

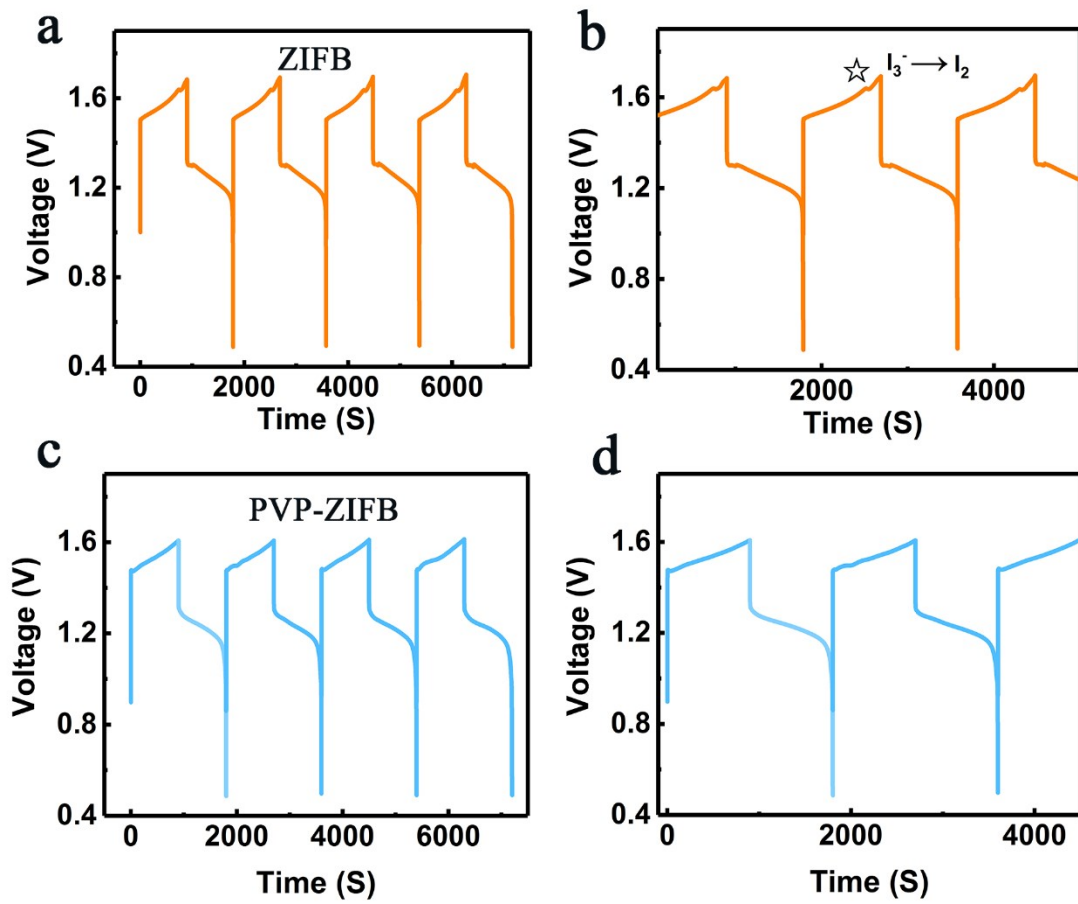

Fig. S3. Charge-discharge voltage profiles at  $20 \text{ mA cm}^{-2}$ . (a)-(b) ZIFB; (c)-(d) PVP-ZIFB.

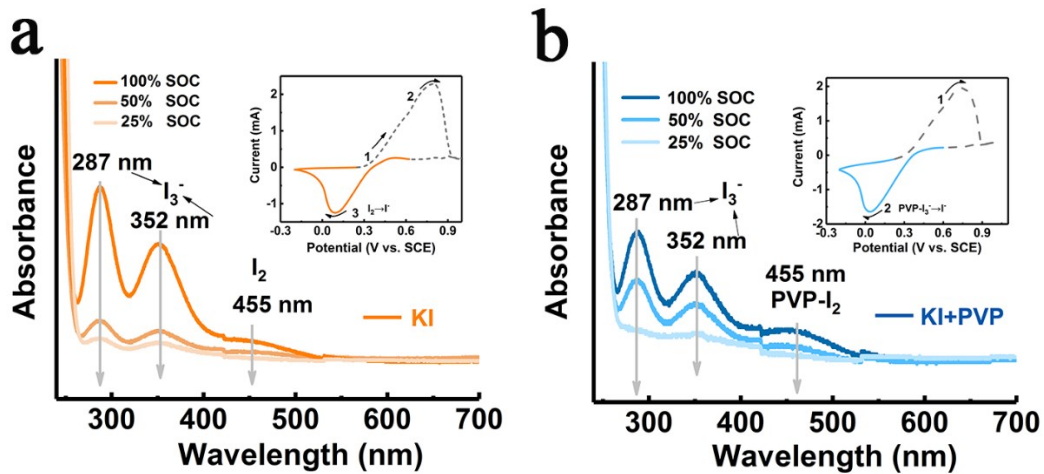

Fig. S4. The variations of UV-Vis spectra upon reduction for (a) 1 M KI and (b) 1 M KI + PVP.



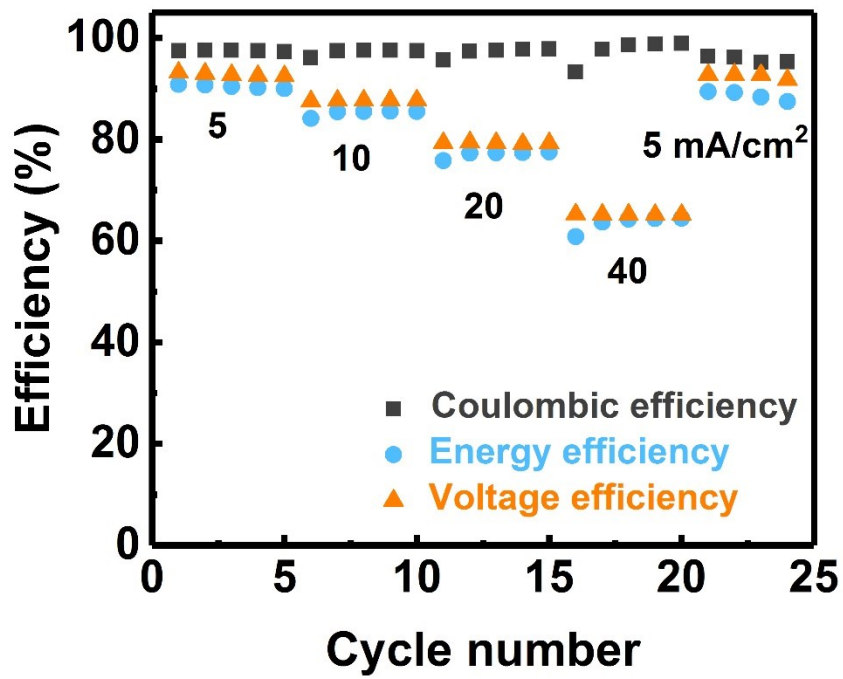

Fig. S5. Rate performance of PVP-ZIFB.

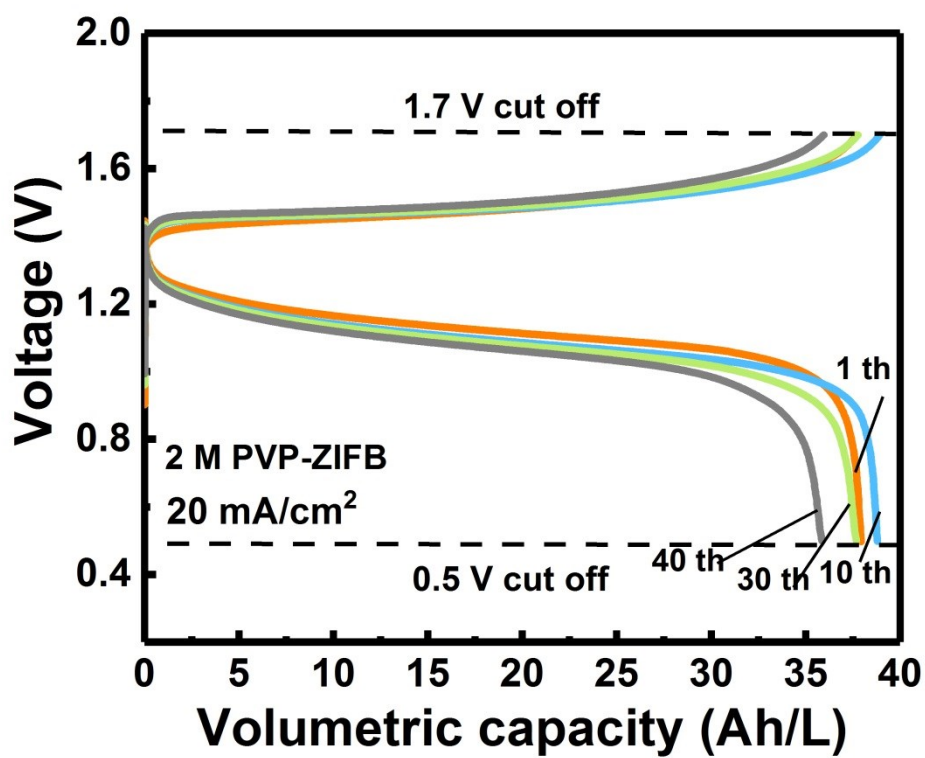

Fig. S6. Charge-discharge curves of PVP-ZIFB at 20 mA cm<sup>-2</sup> with 2 M I<sub>3</sub><sup>-</sup>.

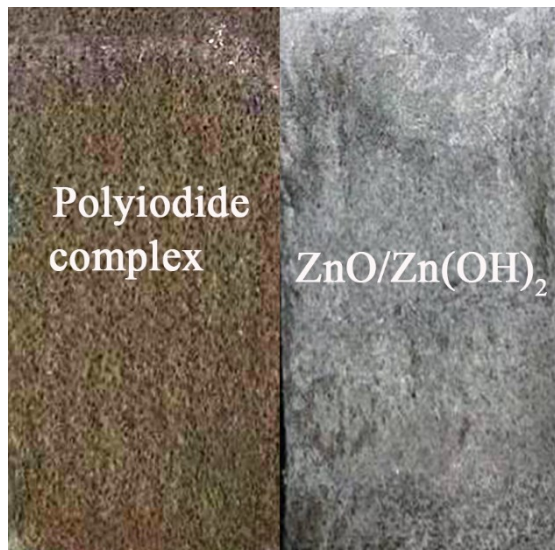

Fig. S7. Carbon felts after long-term charge-discharge cycling (120 h).

Table S1. Calculated binding energy of NVP-I<sub>2</sub>

| NVP-I <sub>2</sub> /Hatree | NVP/Hatree   | I <sub>2</sub> /Hatree | Binding energy (Ha) |
|----------------------------|--------------|------------------------|---------------------|
| -14203.8274268             | -363.6827210 | -13840.1294754         | -0.0152             |

Table S2. Summary of ZIFB and PVP-ZIFB performance for 1 M I<sup>-</sup> at 20 mA cm<sup>-2</sup>

| System   | Average charge voltage (V) | Average discharge voltage (V) | Volumetric discharge capacity (Ah/L) |
|----------|----------------------------|-------------------------------|--------------------------------------|
| ZIFB     | 1.65                       | 1.2                           | 12                                   |
| PVP-ZIFB | 1.55                       | 1.3                           | 19                                   |

Table S3. Summary of PVP-ZIFB performance at 20 mA cm<sup>-2</sup> with different concentrations of I<sup>-</sup>

| Catholyte composition | Average charge Voltage (V) | Average discharge Voltage (V) | Volumetric discharge capacity (Ah/L) |
|-----------------------|----------------------------|-------------------------------|--------------------------------------|
| 1 M I <sup>-</sup>    | 1.55                       | 1.3                           | 19                                   |
| 2 M I <sup>-</sup>    | 1.5                        | 1.2                           | 37                                   |
| 6 M I <sup>-</sup>    | 1.45                       | 1.15                          | 115                                  |

Table S4. Theoretical volumetric capacity and energy density of PVP-ZIFB

| Catholyte composition | Theoretical volumetric capacity (Ah/L) | Theoretical energy density (Wh/L) |
|-----------------------|----------------------------------------|-----------------------------------|
| 1 M I <sup>-</sup>    | 17.86-26.8                             | 23.2-34.8                         |
| 4 M I <sup>-</sup>    | 71.47-107.2                            | 92.83-139.2                       |
| 6 M I <sup>-</sup>    | 107.2-160.8                            | 139.2-208                         |

Table S5. The costs of chemicals

| Chemical materials | Price (\$/kg) | Molar mass (g/mol) |
|--------------------|---------------|--------------------|
| KI                 | 85.7          | 166                |
| ZnI <sub>2</sub>   | 159.88        | 319                |
| ZnBr <sub>2</sub>  | 49.7          | 225                |
| NH <sub>4</sub> Br | 15.83         | 97.94              |
| NH <sub>4</sub> Cl | 6.114         | 53.49              |
| NH <sub>4</sub> I  | 160.68        | 144.94             |
| PVP                | 27.77         | N/A                |

Table S6. Molar capacity for different catholyte compositions

| Catholyte composition                | Molar capacity (Ah/mol) | Reference |
|--------------------------------------|-------------------------|-----------|
| KI                                   | 12                      | This work |
| ZnI <sub>2</sub>                     | 28                      | [20]      |
| ZnI <sub>2</sub> +NH <sub>4</sub> Br | 39                      | [20]      |
| ZnI <sub>2</sub> +ZnBr <sub>2</sub>  | 35                      | [27]      |
| ZnI <sub>2</sub>                     | 34                      | [18]      |
| NH <sub>4</sub> I/NH <sub>4</sub> Cl | 17.9                    | [22]      |
| KI+PVP                               | 19                      | This work |

Table S7. Comparison of the PVP-ZIFB system with other ZIFB systems

| Catholyte                            | Concentration of I <sup>-</sup> (mol L <sup>-1</sup> ) | Electrode area (cm <sup>2</sup> ) | Unlocking capacity (%) | Price (\$/mol L <sup>-1</sup> ) | No. of cycles | Current density (mA/cm <sup>2</sup> ) | CE/EE    | Reference |
|--------------------------------------|--------------------------------------------------------|-----------------------------------|------------------------|---------------------------------|---------------|---------------------------------------|----------|-----------|
| KI                                   | 6                                                      | 28                                | 0                      | 1.19                            | 50            | 20                                    | 99%/78%  | This work |
| ZnI <sub>2</sub>                     | 1                                                      | 5                                 | 0                      | 1.82                            | 30            | 40                                    | 99%/82%  | [20]      |
| ZnI <sub>2</sub>                     | 7                                                      | 40                                | 21%                    | 1.5                             | 40            | 10                                    | 99%/82%  | [18]      |
| ZnI <sub>2</sub> +NH <sub>4</sub> Br | 1                                                      | 5                                 | 39.2%                  | 1.5                             | 100           | 40                                    | 99%/85%  | [20]      |
| ZnI <sub>2</sub> +ZnBr <sub>2</sub>  | 7                                                      | 4                                 | 38.8%                  | 3.72                            | 50            | 10                                    | ~95%/N/A | [27]      |
| NH <sub>4</sub> I+NH <sub>4</sub> Cl | 2.5                                                    | 9                                 | 49.2%                  | 1.33                            | 1200          | 20                                    | 99%/88%  | [22]      |
| NaI+PC                               | 1.5                                                    | 5 *                               | 48.8%                  | > 0.92**                        | 50            | 20                                    | 90%/68%  | [25]      |
| KI+PVP                               | 6                                                      | 28                                | 58.3%                  | 0.75                            | 600           | 20                                    | 99%/79%  | This work |

\* Based on observation from the photo [25]

\*\* Mass of PC is not available in [25]
